# Supplementary material for: A strategic initiative to facilitate knowledge translation research in rehabilitation
Source: PubMed Central journal article supplement (PMC7585309; doi:10.1186/s12913-020-05772-8), 2020-10-23
Supplement: 12913_2020_5772_MOESM1_ESM.pdf [file 12913_2020_5772_MOESM1_ESM.pdf]

**Additional File 1: Environmental scan eligibility criteria**

| <b>Type of data</b>                                                    | <b>Eligibility criteria</b>                                                                                                                                                                                                                                                                                                                                                                                                                                                                                                                                                                                                                                                                                                                                                                                                                                                                                                                                                                                                                                                                                                                                                                                                                                                                             |             |             |                 |               |                |                  |                     |                           |                     |                  |             |                           |                     |                     |                              |             |              |                        |                          |             |               |                  |
|------------------------------------------------------------------------|---------------------------------------------------------------------------------------------------------------------------------------------------------------------------------------------------------------------------------------------------------------------------------------------------------------------------------------------------------------------------------------------------------------------------------------------------------------------------------------------------------------------------------------------------------------------------------------------------------------------------------------------------------------------------------------------------------------------------------------------------------------------------------------------------------------------------------------------------------------------------------------------------------------------------------------------------------------------------------------------------------------------------------------------------------------------------------------------------------------------------------------------------------------------------------------------------------------------------------------------------------------------------------------------------------|-------------|-------------|-----------------|---------------|----------------|------------------|---------------------|---------------------------|---------------------|------------------|-------------|---------------------------|---------------------|---------------------|------------------------------|-------------|--------------|------------------------|--------------------------|-------------|---------------|------------------|
| <p>Researchers found (universities, research centers and FRQS)</p>     | <p><u>Inclusion criteria:</u><br/>           1) Researcher's description, publication or project include one of these terms</p> <table border="0"> <tr> <td>- Transfert</td> <td>- Transfer</td> </tr> <tr> <td>- Connaissances</td> <td>- Knowledge</td> </tr> <tr> <td>- Intégration</td> <td>- Translation</td> </tr> <tr> <td>- Implantation</td> <td>- Integration</td> </tr> <tr> <td>- Données probantes</td> <td>- Implementation</td> </tr> <tr> <td>- Synthèse</td> <td>- Evidence based practice</td> </tr> <tr> <td>- Guide de pratique</td> <td>- Synthesis</td> </tr> <tr> <td>- Outil de prise de décision</td> <td>- Guideline</td> </tr> <tr> <td>- Algorithme</td> <td>- Decision making tool</td> </tr> <tr> <td>- Outil de connaissances</td> <td>- Algorithm</td> </tr> <tr> <td>- Application</td> <td>- Knowledge tool</td> </tr> </table> <p>2) AND has a field of work related to physical disabilities</p> <p><u>Exclusion criteria:</u><br/>           1) A person not eligible to receive funding<br/>           2) Rehabilitation conducted in the field of mental health<br/>           3) Research conducted in other unrelated fields of research<br/>           4) Retired researcher<br/>           5) No identification of their work in KT in their description</p> | - Transfert | - Transfer  | - Connaissances | - Knowledge   | - Intégration  | - Translation    | - Implantation      | - Integration             | - Données probantes | - Implementation | - Synthèse  | - Evidence based practice | - Guide de pratique | - Synthesis         | - Outil de prise de décision | - Guideline | - Algorithme | - Decision making tool | - Outil de connaissances | - Algorithm | - Application | - Knowledge tool |
| - Transfert                                                            | - Transfer                                                                                                                                                                                                                                                                                                                                                                                                                                                                                                                                                                                                                                                                                                                                                                                                                                                                                                                                                                                                                                                                                                                                                                                                                                                                                              |             |             |                 |               |                |                  |                     |                           |                     |                  |             |                           |                     |                     |                              |             |              |                        |                          |             |               |                  |
| - Connaissances                                                        | - Knowledge                                                                                                                                                                                                                                                                                                                                                                                                                                                                                                                                                                                                                                                                                                                                                                                                                                                                                                                                                                                                                                                                                                                                                                                                                                                                                             |             |             |                 |               |                |                  |                     |                           |                     |                  |             |                           |                     |                     |                              |             |              |                        |                          |             |               |                  |
| - Intégration                                                          | - Translation                                                                                                                                                                                                                                                                                                                                                                                                                                                                                                                                                                                                                                                                                                                                                                                                                                                                                                                                                                                                                                                                                                                                                                                                                                                                                           |             |             |                 |               |                |                  |                     |                           |                     |                  |             |                           |                     |                     |                              |             |              |                        |                          |             |               |                  |
| - Implantation                                                         | - Integration                                                                                                                                                                                                                                                                                                                                                                                                                                                                                                                                                                                                                                                                                                                                                                                                                                                                                                                                                                                                                                                                                                                                                                                                                                                                                           |             |             |                 |               |                |                  |                     |                           |                     |                  |             |                           |                     |                     |                              |             |              |                        |                          |             |               |                  |
| - Données probantes                                                    | - Implementation                                                                                                                                                                                                                                                                                                                                                                                                                                                                                                                                                                                                                                                                                                                                                                                                                                                                                                                                                                                                                                                                                                                                                                                                                                                                                        |             |             |                 |               |                |                  |                     |                           |                     |                  |             |                           |                     |                     |                              |             |              |                        |                          |             |               |                  |
| - Synthèse                                                             | - Evidence based practice                                                                                                                                                                                                                                                                                                                                                                                                                                                                                                                                                                                                                                                                                                                                                                                                                                                                                                                                                                                                                                                                                                                                                                                                                                                                               |             |             |                 |               |                |                  |                     |                           |                     |                  |             |                           |                     |                     |                              |             |              |                        |                          |             |               |                  |
| - Guide de pratique                                                    | - Synthesis                                                                                                                                                                                                                                                                                                                                                                                                                                                                                                                                                                                                                                                                                                                                                                                                                                                                                                                                                                                                                                                                                                                                                                                                                                                                                             |             |             |                 |               |                |                  |                     |                           |                     |                  |             |                           |                     |                     |                              |             |              |                        |                          |             |               |                  |
| - Outil de prise de décision                                           | - Guideline                                                                                                                                                                                                                                                                                                                                                                                                                                                                                                                                                                                                                                                                                                                                                                                                                                                                                                                                                                                                                                                                                                                                                                                                                                                                                             |             |             |                 |               |                |                  |                     |                           |                     |                  |             |                           |                     |                     |                              |             |              |                        |                          |             |               |                  |
| - Algorithme                                                           | - Decision making tool                                                                                                                                                                                                                                                                                                                                                                                                                                                                                                                                                                                                                                                                                                                                                                                                                                                                                                                                                                                                                                                                                                                                                                                                                                                                                  |             |             |                 |               |                |                  |                     |                           |                     |                  |             |                           |                     |                     |                              |             |              |                        |                          |             |               |                  |
| - Outil de connaissances                                               | - Algorithm                                                                                                                                                                                                                                                                                                                                                                                                                                                                                                                                                                                                                                                                                                                                                                                                                                                                                                                                                                                                                                                                                                                                                                                                                                                                                             |             |             |                 |               |                |                  |                     |                           |                     |                  |             |                           |                     |                     |                              |             |              |                        |                          |             |               |                  |
| - Application                                                          | - Knowledge tool                                                                                                                                                                                                                                                                                                                                                                                                                                                                                                                                                                                                                                                                                                                                                                                                                                                                                                                                                                                                                                                                                                                                                                                                                                                                                        |             |             |                 |               |                |                  |                     |                           |                     |                  |             |                           |                     |                     |                              |             |              |                        |                          |             |               |                  |
| <p>Projects funded by all funding agencies and organizations found</p> | <p><u>Inclusion criteria:</u><br/>           1) Project's description or title include one of these terms:</p> <table border="0"> <tr> <td>- Transfert</td> <td>- Knowledge</td> </tr> <tr> <td>- Connaissances</td> <td>- Integration</td> </tr> <tr> <td>- Intégration,</td> <td>- Implementation</td> </tr> <tr> <td>- Données probantes</td> <td>- Evidence based practice</td> </tr> <tr> <td>- Implantation</td> <td>- Dissemination</td> </tr> <tr> <td>- Optimiser</td> <td>- Guide</td> </tr> <tr> <td>- Application</td> <td>-Practice guideline</td> </tr> <tr> <td>- Evaluation</td> <td>- Optimize</td> </tr> </table> <p>2) Description rely to KT</p> <p>3) Field of work related to physical disabilities</p> <p><u>Exclusion criteria:</u><br/>           1) A person not eligible to receive funding<br/>           2) Rehabilitation conducted in the field of mental health<br/>           3) Research conducted in other unrelated fields of research</p>                                                                                                                                                                                                                                                                                                                          | - Transfert | - Knowledge | - Connaissances | - Integration | - Intégration, | - Implementation | - Données probantes | - Evidence based practice | - Implantation      | - Dissemination  | - Optimiser | - Guide                   | - Application       | -Practice guideline | - Evaluation                 | - Optimize  |              |                        |                          |             |               |                  |
| - Transfert                                                            | - Knowledge                                                                                                                                                                                                                                                                                                                                                                                                                                                                                                                                                                                                                                                                                                                                                                                                                                                                                                                                                                                                                                                                                                                                                                                                                                                                                             |             |             |                 |               |                |                  |                     |                           |                     |                  |             |                           |                     |                     |                              |             |              |                        |                          |             |               |                  |
| - Connaissances                                                        | - Integration                                                                                                                                                                                                                                                                                                                                                                                                                                                                                                                                                                                                                                                                                                                                                                                                                                                                                                                                                                                                                                                                                                                                                                                                                                                                                           |             |             |                 |               |                |                  |                     |                           |                     |                  |             |                           |                     |                     |                              |             |              |                        |                          |             |               |                  |
| - Intégration,                                                         | - Implementation                                                                                                                                                                                                                                                                                                                                                                                                                                                                                                                                                                                                                                                                                                                                                                                                                                                                                                                                                                                                                                                                                                                                                                                                                                                                                        |             |             |                 |               |                |                  |                     |                           |                     |                  |             |                           |                     |                     |                              |             |              |                        |                          |             |               |                  |
| - Données probantes                                                    | - Evidence based practice                                                                                                                                                                                                                                                                                                                                                                                                                                                                                                                                                                                                                                                                                                                                                                                                                                                                                                                                                                                                                                                                                                                                                                                                                                                                               |             |             |                 |               |                |                  |                     |                           |                     |                  |             |                           |                     |                     |                              |             |              |                        |                          |             |               |                  |
| - Implantation                                                         | - Dissemination                                                                                                                                                                                                                                                                                                                                                                                                                                                                                                                                                                                                                                                                                                                                                                                                                                                                                                                                                                                                                                                                                                                                                                                                                                                                                         |             |             |                 |               |                |                  |                     |                           |                     |                  |             |                           |                     |                     |                              |             |              |                        |                          |             |               |                  |
| - Optimiser                                                            | - Guide                                                                                                                                                                                                                                                                                                                                                                                                                                                                                                                                                                                                                                                                                                                                                                                                                                                                                                                                                                                                                                                                                                                                                                                                                                                                                                 |             |             |                 |               |                |                  |                     |                           |                     |                  |             |                           |                     |                     |                              |             |              |                        |                          |             |               |                  |
| - Application                                                          | -Practice guideline                                                                                                                                                                                                                                                                                                                                                                                                                                                                                                                                                                                                                                                                                                                                                                                                                                                                                                                                                                                                                                                                                                                                                                                                                                                                                     |             |             |                 |               |                |                  |                     |                           |                     |                  |             |                           |                     |                     |                              |             |              |                        |                          |             |               |                  |
| - Evaluation                                                           | - Optimize                                                                                                                                                                                                                                                                                                                                                                                                                                                                                                                                                                                                                                                                                                                                                                                                                                                                                                                                                                                                                                                                                                                                                                                                                                                                                              |             |             |                 |               |                |                  |                     |                           |                     |                  |             |                           |                     |                     |                              |             |              |                        |                          |             |               |                  |
