# Supplementary material for: A strategic initiative to facilitate knowledge translation research in rehabilitation
Source: PubMed Central journal article supplement (PMC7585309; doi:10.1186/s12913-020-05772-8), 2020-10-23
Supplement: 12913_2020_5772_MOESM2_ESM.pdf [file 12913_2020_5772_MOESM2_ESM.pdf]

**Additional File 2: Search Strategy, Criteria for Universities**

| <b>Universities</b>                   | <b>Schools or departments</b>                                                                                                                                                                                    | <b>Consultation date</b>   |
|---------------------------------------|------------------------------------------------------------------------------------------------------------------------------------------------------------------------------------------------------------------|----------------------------|
| Université de Montréal                | École de réadaptation<br>École d'orthophonie et audiologie<br>Faculté des sciences infirmières<br>Département de psychologie<br>Département de kinésiologie                                                      | Between June and July 2015 |
| Université McGill                     | School of Rehabilitation<br>School of Nursing<br>Kinesiology and physical education<br>School of communication sciences and disorders<br>Department of Psychology                                                |                            |
| Université Sherbrooke                 | Faculté de médecine et des sciences de la santé<br>Faculté des sciences de l'activité physique<br>Département de psychologie                                                                                     |                            |
| Université Laval                      | Département de réadaptation<br>Département de kinésiologie<br>Faculté des sciences infirmières<br>École de psychologie                                                                                           |                            |
| Université du Québec à Trois-Rivières | Département de chiropratique<br>Département d'ergothérapie<br>Département d'orthophonie<br>Département de psychologie<br>Département des sciences de l'activité physique<br>Département des sciences infirmières |                            |
| Concordia University                  | All programs and departments by key words                                                                                                                                                                        |                            |
| Université du Québec à Montréal       | All programs and departments by key word                                                                                                                                                                         |                            |
| Université du Québec à Chicoutimi     | All departments                                                                                                                                                                                                  |                            |
