# Supplementary material for: A strategic initiative to facilitate knowledge translation research in rehabilitation
Source: PubMed Central journal article supplement (PMC7585309; doi:10.1186/s12913-020-05772-8), 2020-10-23
Supplement: 12913_2020_5772_MOESM3_ESM.pdf [file 12913_2020_5772_MOESM3_ESM.pdf]

**Additional File 3: Search Strategy: Research Centers Criteria**

| <b>Research centers</b>                                                                | <b>Axes of research</b>                                                                                                                                                                                                                                                                                                                                      |
|----------------------------------------------------------------------------------------|--------------------------------------------------------------------------------------------------------------------------------------------------------------------------------------------------------------------------------------------------------------------------------------------------------------------------------------------------------------|
| Center for Interdisciplinary Research in Rehabilitation of Greater Montreal [69]       | All full and associate members                                                                                                                                                                                                                                                                                                                               |
| Centre de recherche de l'Institut universitaire de gériatrie de Montréal (CRIUGM)      | All researchers (laboratory directors) and associate researchers                                                                                                                                                                                                                                                                                             |
| Centre de recherche du CHU Sainte-Justine                                              | Brain and Child Development (Topics: Neurodevelopmental Studies), Metabolic Health and Complex Diseases (Topics: Genetic and metabolic diseases in Quebec: diagnosis, mechanisms and interventions, Cardiometabolic and vascular health: genetic and environmental approaches, Respiratory health), Musculoskeletal Diseases and Rehabilitation (all topics) |
| Center for Interdisciplinary Research in Rehabilitation and Social Integration (CIRRS) | All researchers                                                                                                                                                                                                                                                                                                                                              |
| Research Institute of McGill University Health Centre                                  | Regular members on Health Outcomes, Cardiovascular Diseases and Critical Care, Musculoskeletal Disorders, Neurosciences and Respiratory Health                                                                                                                                                                                                               |
| Centre de recherche du CHUM                                                            | All researchers                                                                                                                                                                                                                                                                                                                                              |
| Centre de recherche sur le vieillissement de Sherbrooke                                | All researchers                                                                                                                                                                                                                                                                                                                                              |
