# Supplementary material for: A strategic initiative to facilitate knowledge translation research in rehabilitation
Source: PubMed Central journal article supplement (PMC7585309; doi:10.1186/s12913-020-05772-8), 2020-10-23
Supplement: 12913_2020_5772_MOESM4_ESM.pdf [file 12913_2020_5772_MOESM4_ESM.pdf]

**Additional File 4: Search Strategy, Funding Agencies and Organizations**

| <b>Funding agency or organization</b>                                                             | <b>Search strategy</b>                                                                                                                                                                                                                                                                                                                                   | <b>Consultation date</b>           |
|---------------------------------------------------------------------------------------------------|----------------------------------------------------------------------------------------------------------------------------------------------------------------------------------------------------------------------------------------------------------------------------------------------------------------------------------------------------------|------------------------------------|
| Fonds de recherche du Québec (FRQ)                                                                | <u>By researcher:</u><br>Search by researcher name (all researchers)<br>Field of application:<br>Public Health OR<br>Foundations and Knowledge Acquisition OR<br>Health System Management<br>Key words and Research Interests<br>Connaissance OR Probante OR Implantation OR<br>Transfert<br>AND Knowledge OR Evidence OR Implementation<br>OR Transfert | February 25 <sup>th</sup><br>2015  |
| Fonds de recherche en santé du Québec (FRQS)                                                      | <u>By project in FROQS</u><br>All domains, All establishments, All programs and from 2012-2013 to 2015-2016                                                                                                                                                                                                                                              | October 9 <sup>th</sup><br>2015    |
| Institut de recherche en santé et sécurité au travail (IRSST)                                     | Research Projects held between 2005 and 2015<br>Research domains:<br>Prévention des risques mécaniques et physiques<br>Réadaptation au travail                                                                                                                                                                                                           | February 17 <sup>th</sup><br>2015  |
| Canadian Institute of Health Research (CIHR)                                                      | Research Projects<br>Program: Program Family<br>Operating Grant<br>All year/month<br>Peer review Committee<br>Knowledge Translation Research                                                                                                                                                                                                             | February 19 <sup>th</sup><br>2015  |
| Office des personnes handicapées du Québec [70]                                                   | Research Projects<br>Financed by the OPHQ<br>All documents with subject: Santé et réadaptation                                                                                                                                                                                                                                                           | March 6 <sup>th</sup><br>2015      |
| Institut national d'excellence en santé et en services sociaux (INESS)                            | Research Projects after 2005<br>Publications: Transfert des connaissances OR<br>Knowledge OR Implementation OR implantation OR<br>application                                                                                                                                                                                                            | March 6 <sup>th</sup><br>2015      |
| Social Sciences and Humanities Research Council of Canada                                         | Year: Between 2005 and 2013<br>All programs and grants opportunities<br>Domain: health<br>Terms of research: Transfert OR Connaissances OR<br>Implantation OR Application OR Implementation<br>OR Knowledge OR transfer OR translation                                                                                                                   | March 6 <sup>th</sup><br>2015      |
| Réseau provincial de recherche en adaptation-réadaptation (REPAR)                                 | Project funded between 2005 and 2015 related to KT in rehabilitation                                                                                                                                                                                                                                                                                     | Between<br>March and<br>April 2015 |
| Quebec Network for Research in Aging - Réseau Québécois de recherche sur le vieillissement (RQRV) |                                                                                                                                                                                                                                                                                                                                                          |                                    |

|                                                                                          |  |  |
|------------------------------------------------------------------------------------------|--|--|
| Association des établissements de réadaptation en déficience physique du Québec (AERDPQ) |  |  |
| Association québécoise d'établissements de santé et de services sociaux (AQESSS)         |  |  |
| Institut national de santé publique du Québec (INSPQ)                                    |  |  |
| Association francophone pour le savoir (ACFAS)                                           |  |  |
| Ordre des ergothérapeutes du Québec (OEQ)                                                |  |  |
| Ordre professionnel de la physiothérapie du Québec (OPPQ)                                |  |  |
| Edith Strauss Foundation                                                                 |  |  |
