# Supplementary material for: A strategic initiative to facilitate knowledge translation research in rehabilitation
Source: PubMed Central journal article supplement (PMC7585309; doi:10.1186/s12913-020-05772-8), 2020-10-23
Supplement: 12913_2020_5772_MOESM5_ESM.pdf [file 12913_2020_5772_MOESM5_ESM.pdf]

**Additional File 5. Description of the KT-SIRQ working group members**

| <b>Name</b>                                              | <b>Expertise</b>                                                                                                                                                         | <b>Client population expertise</b>                                         |
|----------------------------------------------------------|--------------------------------------------------------------------------------------------------------------------------------------------------------------------------|----------------------------------------------------------------------------|
| Aliki Thomas<br>PhD, OT                                  | Evidence-based practice Implementation science<br>Use of theory in KT interventions<br>EBP education                                                                     | Stroke and professional education                                          |
| Dahlia Kairy<br>PhD, PT                                  | Rehabilitation technology evaluation<br>Implementation science<br>Telerehabilitation                                                                                     | Adults in rehabilitation, with focus on stroke and neurological conditions |
| Sara Ahmed<br>PhD, PT                                    | Health outcome evaluation<br>E-health technologies<br>Evidence-based practice                                                                                            | Musculoskeletal, respiratory, neurological conditions                      |
| Dana Anaby<br>PhD, BOT                                   | Participation-based interventions and measurements;<br>Implementation strategies                                                                                         | Children and youth with physical disabilities                              |
| André Bussi eres<br>PhD, DC                              | Evidence-based guidelines developments and uptake<br>Knowledge synthesis<br>Implementation research<br>Professional behaviour change                                     | Musculoskeletal health                                                     |
| Chantal Camden,<br>PhD, PT                               | Integrated knowledge translation<br>Evidence-based practice in rehabilitation<br>Evaluation research<br>Participatory research                                           | Childhood Disabilities                                                     |
| Marie-Eve Lamontagne<br>PhD, OT                          | Knowledge translation<br>Implementation of best practices                                                                                                                | Neurotraumatology (traumatic brain injury, spinal cord injury and stroke)  |
| Annie Rochette<br>PhD, OT                                | Knowledge transfer and identification of facilitators and barriers for implementation of EBP<br>Leader of the <a href="http://www.strokengine.ca">www.strokengine.ca</a> | Stroke                                                                     |
| Keiko Shikako-Thomas<br>PhD, OT                          | KT Process between research and policymaking, Knowledge translation tools for clinicians and families                                                                    | Childhood Disabilities                                                     |
| Katherine Montpetit-Tourangeau, PhD (candidate), MSc, PT | Implementation science<br>Development and assessment of education strategies                                                                                             | Musculoskeletal and professional education                                 |

BOT: Baccalaureate in Occupational Therapy

DC: Doctor of Chiropractic

MSc: Master of Science degree

OT: Occupational Therapist

PhD : Doctor of Philosophy

PT: Physical Therapist
