# Supplementary material for: A strategic initiative to facilitate knowledge translation research in rehabilitation
Source: PubMed Central journal article supplement (PMC7585309; doi:10.1186/s12913-020-05772-8), 2020-10-23
Supplement: 12913_2020_5772_MOESM6_ESM.pdf [file 12913_2020_5772_MOESM6_ESM.pdf]

**Additional File 6: Expert consultation questions**

Do you find the summary and strategic plan coherent? Please specify.

Do you think the strategic plan elaborated is realistic? Please specify.

Do you think the strategic plan corresponds to knowledge translation needs and trends?

What would you edit or add to the strategic plan?

Do you have any other comments or suggestions for the strategic plan?
