# Supplementary material for: A strategic initiative to facilitate knowledge translation research in rehabilitation
Source: PubMed Central journal article supplement (PMC7585309; doi:10.1186/s12913-020-05772-8), 2020-10-23
Supplement: 12913_2020_5772_MOESM7_ESM.pdf [file 12913_2020_5772_MOESM7_ESM.pdf]

**Additional File 7: Projects Identified per Funding Agency or Organization**

| <b>Funding agency or organization</b>                                                                                                                                              | <b>Information found</b>                                                                                          |
|------------------------------------------------------------------------------------------------------------------------------------------------------------------------------------|-------------------------------------------------------------------------------------------------------------------|
| Fonds de recherche du Québec (FRQ)                                                                                                                                                 | 14 projects related to KT and physical disabilities                                                               |
| Institut de recherche en santé et sécurité au travail (IRSST)                                                                                                                      | 4 projects related to KT and physical disabilities                                                                |
| Canadian Institute of Health Research (CIHR)                                                                                                                                       | 5 projects related to KT and physical disabilities                                                                |
| Office des personnes handicapées du Québec [70]                                                                                                                                    | No project found                                                                                                  |
| Institut national d'excellence en santé et en services sociaux (INESS)                                                                                                             | 2 projects related to KT and physical disabilities                                                                |
| Social Sciences and Humanities Research Council of Canada                                                                                                                          | No project found                                                                                                  |
| Réseau provincial de recherche en adaptation-réadaptation (REPAR)                                                                                                                  | 20.5 projects related to KT and physical disabilities (one project funded half by the REPAR and half by the OPPQ) |
| Quebec Network for Research in Aging - Réseau Québécois de recherche sur le vieillissement (RQRV)                                                                                  | No project found                                                                                                  |
| Association des établissements de réadaptation en déficience physique du Québec (AERDPQ) with the Association québécoise d'établissements de santé et de services sociaux (AQESSS) | 5 projects related to KT and physical disabilities                                                                |
| Institut national de santé publique du Québec (INSPQ)                                                                                                                              | No project found                                                                                                  |
| Association francophone pour le savoir (ACFAS)                                                                                                                                     | No project found                                                                                                  |
| Ordre des ergothérapeutes du Québec (OEQ)                                                                                                                                          | No project found                                                                                                  |
| Ordre professionnel de la physiothérapie du Québec (OPPQ)                                                                                                                          | 1.5 projects related to KT and physical disabilities (one project funded half by the REPAR and half by the OPPQ)  |
| Edith Strauss Foundation                                                                                                                                                           | 42 projects related to KT with physical disabilities                                                              |
