# Supplementary material for: A strategic initiative to facilitate knowledge translation research in rehabilitation
Source: PubMed Central journal article supplement (PMC7585309; doi:10.1186/s12913-020-05772-8), 2020-10-23
Supplement: 12913_2020_5772_MOESM8_ESM.pdf [file 12913_2020_5772_MOESM8_ESM.pdf]

**Additional File 8: Goal, Strategies and Tactics Prioritization**

(Delphi consensus)

**Vision:** To enhance the health of individuals with physical disabilities in Quebec by advancing KT research in rehabilitation science.

**Mission:** To build capacity and promote collaborative KT research in rehabilitation to improve the delivery of services and ultimately the health and wellbeing of individuals with physical disabilities.

**The goals are to:**

- 1) Build capacity in KT research and implementation and promote networking
- 2) Identify and engage relevant stakeholders (e.g., consumers of rehabilitation services, service providers, organizations, decision makers) to support the mission of the Quebec KT Rehabilitation Strategic Initiative
- 3) Be a catalyst for the creation, application and evaluation of innovative and effective KT strategies for individuals with physical disabilities
- 4) Advance KT research

| GOALS                                                                                                         | STRATEGIES                            | TACTICS/ACTIONS                                                                                                                                                                  |
|---------------------------------------------------------------------------------------------------------------|---------------------------------------|----------------------------------------------------------------------------------------------------------------------------------------------------------------------------------|
| <b>1. BUILDING CAPACITY</b><br><b>Build capacity in KT research and implementation and promote networking</b> | A. Increase access to knowledge in KT | a) Conduct virtual journal club in KT                                                                                                                                            |
|                                                                                                               |                                       | b) Provide expertise and resources to stakeholders (including to identify knowledge synthesis gaps, access to effective KT strategies)                                           |
|                                                                                                               |                                       | c) Offer end of grants, integrated KT workshops (grant writing)                                                                                                                  |
|                                                                                                               |                                       | d) Promote the sharing of KT information                                                                                                                                         |
|                                                                                                               |                                       | e) Create repository of KT tools (indicators, frameworks, references, measures, presenting examples of effective and ineffective KT strategies, open access to evaluation tools) |
|                                                                                                               |                                       | f) Offer virtual training program (workshop for managers and clinicians)                                                                                                         |
|                                                                                                               |                                       | g) Advertise about KT conferences and Café scientifique                                                                                                                          |
|                                                                                                               |                                       | h) Integrate monitoring of ongoing literature (watch)                                                                                                                            |
|                                                                                                               |                                       | i) Promote continuing professional development (KT Canada National Series)                                                                                                       |
|                                                                                                               |                                       | j) Mentor young KT investigators and incorporate grad students in KT meetings                                                                                                    |
|                                                                                                               |                                       | a) Increase awareness of networking and conferences, encourage joining existing communities of practice, advertise KT program and participate to career days                     |

|                                                                                                                                                                                                                                                       |                                                                                                          |                                                                                                                                                                                                                                                                                                                                                                                                                                                                                                                                                                                                                                                                                                          |
|-------------------------------------------------------------------------------------------------------------------------------------------------------------------------------------------------------------------------------------------------------|----------------------------------------------------------------------------------------------------------|----------------------------------------------------------------------------------------------------------------------------------------------------------------------------------------------------------------------------------------------------------------------------------------------------------------------------------------------------------------------------------------------------------------------------------------------------------------------------------------------------------------------------------------------------------------------------------------------------------------------------------------------------------------------------------------------------------|
|                                                                                                                                                                                                                                                       | <p>B. Promoting KT research and implementation</p>                                                       | <p>b) Promote continuing professional development (KT Canada National Series, KT courses, workshops, forums, conferences, fellowships, training opportunities, social media)</p> <p>c) Increase the value and the awareness in KT</p> <p>d) Reach out to other schools and departments (identify relevant training program already existing and influence the KT content)</p> <p>e) Map joint workshops (multidisciplinary)</p> <p>f) Identify and advocate for knowledge brokers (champions, changing agent)</p>                                                                                                                                                                                        |
|                                                                                                                                                                                                                                                       | <p>C. Influence funding opportunities</p>                                                                | <p>a) Engage with funding agencies and organizations</p> <p>b) Encourage researchers to incorporate trainees' funding to the requested budget to support trainees and offer researchers templates on allocating budget in KT for grants</p> <p>c) Map funding opportunities including Patient scholarships</p>                                                                                                                                                                                                                                                                                                                                                                                           |
| <p><b>2. ENGAGE STAKEHOLDERS</b><br/> <b>Identify and engage relevant stakeholders (e.g., consumers of rehabilitation services, service providers, organizations, decision makers) to support the mission of the Qc KT Rehab Strat Initiative</b></p> | <p>A. Identify and engage relevant stakeholders and their needs and priorities</p>                       | <p>a) Conduct and/or access existing environmental scan (researchers, funding agencies, organizations (directors of rehab programs or centers, program managers, clinicians, professional associations, academic institutions, quality improvement and evaluation managers or directors)</p> <p>b) Identify consumers of rehabilitation services (example: patient engagement group)</p> <p>c) Conduct and or access existing assessments, focus groups, advisory committee, ...)</p> <p>d) Provide incentives to participate (compensation for their participation, parking...)</p> <p>e) Hold annual meeting</p> <p>f) Contact stakeholders to identify key players within respective organization</p> |
|                                                                                                                                                                                                                                                       | <p>B. Create a sustainability plan for KT-SIRQ</p>                                                       | <p>a) Create sub-committee to approach stakeholders for funding</p> <p>b) Maintain interest by providing biannual reports and feedback (showing output, outcomes)</p> <p>c) Expand network</p>                                                                                                                                                                                                                                                                                                                                                                                                                                                                                                           |
| <p><b>3. CATALYST FOR KT</b><br/> <b>Be a catalyst for the creation, application and evaluation of innovative and effective KT for individuals with physical disabilities</b></p>                                                                     | <p>A. Support the continuous implementation of evaluation and feedback of interventions and outcomes</p> | <p>a) Support the uptake of effective KT strategies</p> <p>b) Support organizations in accessing high quality, reliable evidence (repository)</p> <p>c) Promote the use of standardized evaluation frameworks to guide program evaluation</p> <p>d) Support the integration of KT approaches as part of program evaluation (QI managers)</p> <p>e) Influence organizations' uptake of common indicators (example: electronic health records and administration data base)</p>                                                                                                                                                                                                                            |

|                                                      |                                                                         |                                                                                                                                                                                                                                                                                                                                                                              |
|------------------------------------------------------|-------------------------------------------------------------------------|------------------------------------------------------------------------------------------------------------------------------------------------------------------------------------------------------------------------------------------------------------------------------------------------------------------------------------------------------------------------------|
|                                                      | B. Promote sustainability of practice change                            | <ul style="list-style-type: none"> <li>a) Help organizations identify champions to ensure sustainability of practice changes</li> <li>b) Promote ongoing involvement of stakeholders (including consumers) as advocate for change</li> <li>c) Promote the use of feedback mechanism regarding successful outcomes to stakeholders within respective organizations</li> </ul> |
| <b>4. Advance KT research in rehabilitation</b>      | A. Identify gaps in KT research in rehabilitation                       | a) Explore the literature to identify KT research gaps (example: patient health outcomes, economic outcomes, process and professional outcomes, sustainability)                                                                                                                                                                                                              |
|                                                      | B. Promote the use of rigorous methods in KT research in rehabilitation | a) Promote use of framework and theories in KT research (Highlight the importance of the use of theories, link with existing resources, provide tools to facilitate the selection of KT theories)                                                                                                                                                                            |
|                                                      |                                                                         | b) Facilitate the development of complex KT interventions                                                                                                                                                                                                                                                                                                                    |
|                                                      |                                                                         | c) Promote the use of evaluation of patient outcomes                                                                                                                                                                                                                                                                                                                         |
|                                                      |                                                                         | d) Influence curriculum development (e.g., advanced KT courses)                                                                                                                                                                                                                                                                                                              |
|                                                      |                                                                         | e) Encourage participation in research networks (e.g., communities of practice)                                                                                                                                                                                                                                                                                              |
| f) Critically appraised topic (CAT) on a), b) and c) |                                                                         |                                                                                                                                                                                                                                                                                                                                                                              |
